2 Proteins in the periplasmic space and outer membrane vesicles of *Rhizobium etli* CE3  
3 grown in minimal medium are largely distinct and change with growth phase

4  
5 Hermenegildo Taboada<sup>1,&</sup>, Niurka Meneses<sup>1,2,3,&</sup>, Michael F. Dunn<sup>1,&</sup>, Carmen Vargas-  
6 Lagunas<sup>1</sup>, Natasha Buchs<sup>2</sup>, Jaime A. Castro-Mondragon<sup>4</sup>, Manfred Heller<sup>2</sup> and Sergio  
7 Encarnación<sup>1\*</sup>.

8  
9 <sup>&</sup>These authors contributed equally to this work.

10

11 <sup>1</sup>Programa de Genómica Funcional de Procariotes, Centro de Ciencias Genómicas,  
12 Universidad Nacional Autónoma de México, Cuernavaca, Morelos C. P. 62210,  
13 México.

14 <sup>2</sup>Mass Spectrometry and Proteomics Laboratory, Department of Clinical Research,  
15 University of Bern, 3010 Bern, Switzerland.

16 <sup>3</sup>Faculty of Science, Department of Chemistry and Biochemistry, University of Bern,  
17 3010 Bern, Switzerland.

18 <sup>4</sup>Aix Marseille University, INSERM, TAGC, Theory and Approaches of Genomic Complexity,  
19 UMR\_S 1090, Marseille, France.

20

21

22 Corresponding author: encarnac@ccg.unam.mx, +52 (777) 3291899

23

## 24 **KEY WORDS**

25 Protein secretion, outer membrane vesicles, periplasm, exoproteome, *Rhizobium*-legume  
26 interactions

27

28

2 **ABSTRACT**

3

4 *Rhizobium etli* CE3 grown in succinate-ammonium minimal medium (MM) excreted  
5 outer membrane vesicles (OMVs) with diameters of 40 to 100 nm. Proteins from the  
6 OMVs and the periplasmic space were isolated from 6 and 24 h cultures and identified  
7 by proteome analysis. A total 770 proteins were identified: 73.8 and 21.3 % of these  
8 proteins occurred only in the periplasm and OMVs, respectively, and only 4.9 % were  
9 found in both locations. The majority of proteins found in either location were present  
10 only at 6 or 24 h: in the periplasm and OMVs, only 24 and 9 % of proteins, respectively,  
11 were present at both sampling times, indicating a time-dependent differential sorting of  
12 proteins into the two compartments. The OMVs contained proteins with physiologically  
13 varied roles, including *Rhizobium* adhering proteins (Rap), polysaccharidases,  
14 polysaccharide export proteins, autoaggregation and adherence proteins, glycosyl  
15 transferases, peptidoglycan binding and cross-linking enzymes, potential cell wall  
16 modifying enzymes, porins, multidrug efflux RND family proteins, ABC transporter  
17 proteins, and heat shock proteins. As expected, proteins with known periplasmic  
18 localizations (phosphatases, phosphodiesterases, pyrophosphatases) were found only in  
19 the periplasm, along with numerous proteins involved in amino acid and carbohydrate  
20 metabolism and transport. Nearly one-quarter of the proteins present in the OMVs were  
21 also found in our previous analysis of the *R. etli* total exproteome of MM-grown cells,  
22 indicating that these nanoparticles are an important mechanism for protein excretion in  
23 this species.

24

25 **IMPORTANCE**

26 The reduction of atmospheric nitrogen to ammonia by rhizobia symbiotically associated  
27 with legumes is of major importance in sustainable agricultural. Rhizobia excrete a

2 variety of symbiotically important proteins using canonical secretion systems. In this  
3 work, we show that *Rhizobium etli* grown in culture also excretes proteins in  
4 membrane-enclosed structures called outer membrane vesicles (OMVs). This study  
5 reports OMV production by rhizobia. Proteins identified in the OMVs included  
6 *Rhizobium* adhering (Rap) and autoaggregation proteins, polysaccharidases, RTX  
7 toxins, porins and multidrug efflux proteins. Some of these proteins have important  
8 roles in the *R. etli*-common bean symbiosis, and their packaging into OMVs could  
9 deliver them to the environment in a concentrated yet diffusible form protected from  
10 degradation. The work described here provides a basis for future studies on the function  
11 of rhizobial OMVs in free life and symbiosis.

12

## 13 INTRODUCTION

14 Bacterial protein secretion is a vital function involving the transport of proteins  
15 from the cytoplasm to other cellular locations, the environment, or to eukaryotic host  
16 cells (1). Of the proteins synthesized by *Escherichia coli* on cytoplasmic ribosomes,  
17 about 22 % are inserted into the inner membrane (IM), while 15 % is targeted to  
18 periplasmic, outer membrane (OM) and extracellular locations (2).

19 The IM is a phospholipid bilayer that surrounds the cytoplasm. The OM is  
20 comprised of an inner leaflet containing phospholipids and lipoproteins and an outer  
21 leaflet comprised mostly of lipopolysaccharide (LPS) and also containing proteins such  
22 as porins (3). The periplasmic space of gram-negative bacteria is delineated by the IM  
23 and OM, with a thin peptidoglycan layer attached to both membranes by membrane  
24 anchored proteins. The periplasm of *E. coli*, for example, contains hundreds of proteins  
25 including transporters, chaperones, detoxification proteins, proteases and nucleases (4,  
26 5).

2 About a dozen specialized export systems for bacterial protein secretion have  
3 been described (1). Gram-negative bacteria also excrete proteins and other substances  
4 in outer membrane vesicles (OMVs). Phospholipid accumulation in the OM triggers the  
5 formation of these spherical structures, which are composed of a membrane bilayer  
6 derived from the bacterial OM (6). The amount of OMVs produced by a given  
7 bacterium varies in response to environmental conditions like growth phase, nutrient  
8 sources, iron and oxygen availability, abiotic stress, presence of host cells, and during  
9 biofilm formation (7). Depending on the species and growth conditions, OMVs may  
10 enclose cytoplasmic, periplasmic and transport proteins, as well as DNA, RNA, and  
11 outer membrane-derived components such as LPS and phospholipids. The inclusion of  
12 proteins in the OMVs is not random but appears to be determined by specific sorting  
13 mechanisms (2-5, 8). Suggested roles for OMVs include invasion, adherence, virulence,  
14 antibiotic resistance, modulation of the host immune response, biofilm formation, intra  
15 and interspecies molecule delivery, nutrient acquisition, and signaling (2, 8-12).

16 Rhizobia are gram-negative bacteria that reduce atmospheric nitrogen to  
17 ammonia in symbiotic association with leguminous plants. The excretion of specific  
18 proteins and polysaccharides by rhizobia is an essential component of this process (13).  
19 The alpha-proteobacterium *Rhizobium etli* CE3 establishes a nitrogen-fixing symbiosis  
20 with *Phaseolus vulgaris* (common bean). We have shown that *R. etli* CE3 secretes many  
21 proteins during exponential and stationary phase growth in minimal medium cultures  
22 (14) and suggested that some of the secreted proteins might be exported in OMVs,  
23 although these nanoparticles have not been reported in rhizobia (15). Mashburn-Warren  
24 and Whiteley have hypothesized that hydrophobic rhizobial nodulation (Nod) factors  
25 could be packaged in OMVs for delivery to the plant root, where they induce plant

2 responses required for nodulation (10). OMVs produced by symbiotic rhizobia have  
3 not, however, been studied experimentally.

4       Relatively few studies have been done on OMVs produced by plant-associated  
5 bacteria, where these protein and molecule-bearing structures could enhance the  
6 benefits obtained by the prokaryote in mutualistic or pathogenic interactions (16, 17).  
7 Our major aim in this work was to identify proteins present in purified *R. etli* OMVs  
8 obtained from cells grown in culture. Because periplasmic proteins could be (perhaps  
9 nonspecifically) incorporated into the OMVs, we also identified proteins in the  
10 periplasm of cells grown under the same conditions. A major finding was that only a  
11 small fraction of the periplasmic proteins were also present in OMVs, which suggests  
12 that they are not randomly incorporated into the latter during vesicle formation. Our  
13 data also indicate that nearly one-quarter of the previously identified exoproteins  
14 produced by *R. etli* (15) are excreted in OMVs.

15

## 16 **RESULTS AND DISCUSSION**

17       **General characteristics of the *R. etli* periplasmic and OMV fractions.** We  
18 used proteome analysis to identify proteins in the periplasmic and OMV fractions  
19 prepared from *R. etli* cultures grown in MM for 6 and 24 h (Table S1, Supplemental  
20 material). Only proteins found in two experimental replicates are included in the dataset  
21 (see Materials and Methods). The suitability of hypo-osmotic shock protocols like the  
22 one used here to isolate periplasmic proteins has been demonstrated in several rhizobia  
23 (18, 19). The presence of cytoplasmic proteins in periplasmic protein preparations is  
24 commonly reported in the literature (see below) and could be an artifact resulting from  
25 cell lysis (20). In the *Pseudomonas aeruginosa* periplasm (obtained by spheroplasting),  
26 39 and 19 % of 395 proteins identified were predicted to be cytoplasmic and

2 periplasmic, respectively (21). The periplasmic proteomes of *Pseudoalteromonas*  
3 *haloplanktis* (22) and *Xanthomonas campestris* pv. *campestris* (23), both obtained by  
4 hypo-osmotic shock, contained many cytoplasmic enzymes for carbohydrate and amino  
5 acid metabolism, among others. In contrast, over 94 % of the 140 proteins obtained by  
6 osmotic shock and identified in the periplasms of *E. coli* strains BL21(DE3) and  
7 MG1655 were predicted to be periplasmic (24).

8         We used the PSLPred program to predict the subcellular localization of *R. etli*  
9 proteins. While the localization predictions made with this program are over 90 %  
10 accurate for proteins from gram negative bacteria (25), we noted that several proteins  
11 had an unexpected predicted localization. For example, the ribosomal proteins S12 and  
12 L31 were predicted to be periplasmic rather than cytoplasmic. Analysis of the *R. etli*  
13 exoproteome using an alternative protein localization prediction program, LocTree3  
14 (26) gave significantly different results in comparison to PSLpred. In the case of the  
15 ribosomal proteins described above, LocTree3 predicted that S12 is in fact cytoplasmic,  
16 but that L31 was secreted.

17         Based on PSLpred, the predicted cellular localizations of the 568 proteins found  
18 only in the *R. etli* periplasm (Table S2, Supplemental material) were 57 % cytoplasmic,  
19 25 % periplasmic, 14.9 % IM, 1.8 % extracellular and 1.4 % OM. Importantly, the 8  
20 highest-abundance proteins found in the total proteome of *R. etli* CE3 grown in MM  
21 (27) under conditions similar to those used in the present study were absent from the  
22 periplasmic or OMV fractions (Table S1, Supplemental material). This result argues  
23 against significant contamination of the periplasmic and OMV fractions with proteins  
24 resulting from cell lysis. Among the proteins identified in the *R. etli* OMVs and  
25 periplasm, all that are classed as phosphatases, phosphodiesterases or pyrophosphatases  
26 were found only in the periplasm (Table S1, Supplemental material), consistent with the

2 biochemically determined localization of these enzymes in other rhizobia (18, 28). In  
3 addition, electron microscopic examination of the cell preparations obtained after hypo-  
4 osmotic shock showed that the IMs were still intact (results not shown).

5 The *R. etli* OMV fraction was obtained by differential centrifugation of culture  
6 filtrates. Transmission electron microscopic examination of the OMVs purified from 6  
7 and 24 h cultures showed that the vesicles were spherical and had diameters of 40 to  
8 100 nm, within size range expected for OMVs (16, 29). No pili, bacteria, flagella or  
9 membrane debris were detected (Fig. 1). SDS-PAGE analysis showed that the OMV  
10 protein patterns differed significantly from those of whole cell extracts (data not  
11 shown), consistent with the proposal that specific protein sorting mechanisms are  
12 important in determining the protein content of bacterial OMVs (3, 10, 30).

13 For proteins present only in the OMVs (Table 1), 39 and 34 % were predicted to  
14 be periplasmic and cytoplasmic, respectively, followed by 14 % IM, 8 % OM and 4 %  
15 extracellular. Although the presence of cytoplasmic and IM proteins as *bona fide*  
16 components of bacterial OMVs is controversial (3, 30), they have been found in similar  
17 proportions in OMVs from several species (29, 31-34). In comparison to the periplasm,  
18 the OMVs contain 5.7 times the number of OM proteins, consistent with the enrichment  
19 of these proteins in bacterial OMVs (30). For the 38 proteins found in both the  
20 periplasmic and OMV fractions (Table S3, Supplemental material), the predicted  
21 localizations were biased towards periplasmic proteins (53 %), followed by cytoplasmic  
22 (29 %), IM (16 %), OM (3 %) and extracellular proteins (0 %).

23 Previously, we identified 383 extracellular proteins in *R. etli* MM culture  
24 filtrates (14), which would include OMVs. Ninety of the proteins that occurred  
25 exclusively in OMVs or in both periplasm and OMVs (Table 1 and Table S3  
26 (Supplemental material)) were also found in the previously determined exoproteome

2 (14). Thus, nearly one-quarter of the exoproteins identified in our previous study were  
3 apparently excreted in OMVs. It should be noted that the mass spectrometric methods  
4 used for protein identification in this and our previous (14, 15) work do not allow the  
5 quantitation of proteins, but only reveals their presence or absence in a sample.

6 The 770 proteins identified in the *R. etli* periplasmic and OMV fractions at 6  
7 and/or 24 h (Table S1 in Supplemental Material) represent 12.8 % of the 6022 predicted  
8 ORFs encoded in its genome. Only 14.2 % of these proteins are plasmid-encoded,  
9 representing less than half of the 32 % of the *R. etli* proteome that is  
10 extrachromosomally encoded. There was no significant difference of the relative  
11 proportion of plasmid-encoded proteins in the periplasm-only, OMV-only, and in both  
12 the periplasm and OMV categories.

13 Of the 770 proteins identified, 568 and 164 (74 and 21 %) occurred exclusively  
14 in the periplasm (Table S1, Supplemental material) and OMV (Table 1) fractions,  
15 respectively. Remarkably, only 4.9 % of the total proteins were found in both fractions  
16 (Table S3, Supplemental material), which argues against the random inclusion of  
17 periplasmic proteins in the OMVs during their formation and supports the idea that  
18 specific protein sorting mechanisms are at least partly responsible for determining OMV  
19 protein content (30).

20 The number and identity of periplasmic and OMV proteins produced by bacteria  
21 changes with culture age and growth conditions (4,30,33). In *R. etli*, we found  
22 significant differences in the identities of the proteins present in the periplasm and  
23 OMVs at 6 versus 24 h (Table S1, Supplemental material). In the periplasm-only  
24 fraction (Table S2, Supplemental material), 31 and 45 % of the proteins were present  
25 only at 6 and 24 h, respectively, and 24 % were present at both 6 and 24 h. For the  
26 proteins found exclusively in the OMVs (Table 1), 49 and 42 % were present only at 6



2 and 24 h, respectively, and 9 % were present at both times. The largely distinct protein  
3 profiles for OMVs from log and stationary phase cultures, with relatively few proteins  
4 present at both sampling times, indicates a time-dependent differential packaging of  
5 proteins into the OMVs. For example, 9 of the OMV-exclusive protein COG groups are  
6 comprised of a majority of proteins that are present at 6 but not 24 h. What accounts for  
7 the disappearance of these proteins between 6 and 24 h? Possibly, these proteins are  
8 selectively degraded within the OMVs, or are released from them, as the culture ages. It  
9 has been proposed that different subpopulations of OMVs with a distinctive protein  
10 content could exist in the same bacterial culture, but this has hardly been addressed  
11 experimentally (35).

12 Proteins without a dedicated transport mechanism might enter the exoproteome  
13 by interacting with one or more proteins that are specifically excreted. We determined  
14 potential protein-protein interactions in the *R. etli* proteome using the ProLinks server  
15 (<http://prl.mbi.ucla.edu/prlbeta/>) (36). While highly probable ( $P = 1.0$ ) interactions were  
16 predicted to occur between some members of the total proteome, none were found  
17 among the proteins identified in the periplasm and/or OMVs, even at the lowest  
18 probability setting ( $P = 0.4$ ).

19 **Functional Distribution of Periplasmic and OMV Proteins.** An important  
20 reason for identifying proteins in the *R. etli* periplasm was to determine if the OMVs  
21 also contained a significant number of these proteins. As mentioned, less than 5 % of  
22 the proteins identified were shared between the two locations. The identity of  
23 periplasmic proteins has perhaps been best established in *E. coli*, which contains a wide  
24 functional diversity of proteins among the hundreds that are present (4). The *R. etli*  
25 periplasmic proteins are also diverse in functional categories (Fig. 2A). The General  
26 functional prediction only COG (R) had the greatest number of proteins (13 % of the

2 total), and proteins involved in amino acid and carbohydrate metabolism and transport  
3 were also highly represented. With the exception of the COGs for periplasmic proteins  
4 having very few or no members (cell cycle control, replication, motility, secondary  
5 metabolism and trafficking/secretion), at least 10 proteins were present in the other  
6 COGs and had a relatively even (Fig. 2A) numerical distribution among them.

7 For proteins present in OMVs but absent in the periplasm, those without an  
8 assigned COG are the most abundantly represented category, accounting for about 21 %  
9 of the total (Table 1 and Fig. 2B). About 59 % of OMV-exclusive proteins in this COG  
10 were present only at 24 h. In comparison, only 5.1 % of present in the periplasm but  
11 absent in OMVs are in this category (Fig. 2A). Note that the majority (61-70 %) of the  
12 proteins without COG present only in the periplasm or only in OMVs were hypothetical  
13 proteins. The rest of the OMV-exclusive proteins were more or less evenly distributed  
14 among many of the remaining COGs, with 6 h samples usually having the greatest  
15 number of proteins. Over half of the COGs lacked representatives from 6 h and/or 24 h,  
16 with several COGs (eg., cell cycle control, coenzyme metabolism, transcription) having  
17 a strikingly lower number of total proteins (Fig. 2B). These comparisons highlight the  
18 fact that distinct temporal and numerical patterns in periplasm and OMV proteins occur  
19 during the growth of *R. etli* in culture. The exoproteins in our dataset (Table S1) were  
20 not biased towards being the products of *R. etli* genes expressed as part of specific  
21 regulons [37-39] or under conditions of biofilm formation (40).

22 **OMV-localized proteins of physiological interest.** Here we mention some of  
23 the OMV proteins with potentially important physiological roles. Based on their  
24 analysis of proteins reported in a variety of OMV proteomes, Lee et al (2008) (41)  
25 found that many of the proteins belonged to a relatively limited number of protein  
26 functional families, including porins, murein hydrolases, multidrug efflux pumps, ABC

2 transporters, proteases/chaperones, adhesins/invasins, and cytoplasmic proteins. Many  
3 of the *R. etli* OMV proteins described below fit into one of these categories.

4         Based on what is known of orthologous proteins in other rhizobia, the Rap  
5 proteins and polysaccharidases described below are probably secreted by the *R. etli*  
6 PrsDE type I secretion system (TISS) (42, 43). The 3 autoaggregation/adherence  
7 proteins (accessions RHE\_RS11065, RHE\_RS12180 and RHE\_RS23910; Table 1)  
8 found in OMVs but not in the periplasm belong to the Rap (Rhizobium adhering  
9 proteins) family and include the sole plasmid-encoded Rap paralog and two of the 4  
10 chromosomally encoded Raps found in *R. etli*. These calcium-binding, cell surface-  
11 localized proteins are found exclusively in *Rhizobium leguminosarum* biovars and in *R.*  
12 *etli* (44), They are important in rhizobial autoaggregation in both species, and in *R.*  
13 *leguminosarum* bv. *trifolii* RapA1 influences binding to host cell roots and, when  
14 overexpressed, nodulation competitiveness on clover (44-46). Curlin (RHE\_RS24865)  
15 forms curli fimbriae, surface proteins that are common in bacteria and that in  
16 Enterobacteria are important for attachment to host cells and for biofilm formation (47).  
17 Whether the *R. etli* Rap proteins and curlin in OMVs acts as an adhesion bridges to  
18 surfaces (12) is a topic for future research.

19         In *R. leguminosarum* bv. *viciae*, the PlyA, B and C polysaccharidases degrade  
20 and reduce the molecular mass of *R. leguminosarum* EPS and also attack  
21 carboxymethylcellulose, an analog of plant cell wall cellulose (42, 48). A number of  
22 similar polysaccharidases were unique to the *R. etli* OMV fraction, namely the right-  
23 handed helix repeat-containing pectin-lyase like PlyB ortholog RHE\_RS13345, the  
24 contiguously-encoded PlyC ortholog RHE\_RS13340 and polysaccharidase  
25 RHE\_RS03110. In *R. leguminosarum*, polysaccharidases PlyA and PlyB have been  
26 well characterized, while the PlyC, which shares a high sequence identity with PlyB has

2 not. PlyA and PlyB are not required for an effective symbiosis between *R.*  
3 *leguminosarum* and pea or vetch (48) but mutants in either polysaccharidase form  
4 significantly less biofilm than the parent strain (49). In *R. leguminosarum* PlyA and  
5 PlyB are secreted by the TISS and diffuse away from the producing cells, but are  
6 inactive until they interact with EPS on the surface of cells in the vicinity. Both  
7 enzymes are able to cleave nascent but not mature EPS chains and are not activated by  
8 partially-purified *R. leguminosarum* EPS (50). If the *R. leguminosarum*  
9 polysaccharidases are present in OMVs like their orthologs in *R. etli* (Table 1), it might  
10 facilitate their delivery to *R. leguminosarum* cells or host plant roots. That a protein  
11 exported by a TISS can be present in OMVs was demonstrated for the *E. coli*  $\alpha$ -  
12 haemolysin (51).

13 The *R. etli* OMVs contained the RTX toxin hemolysin-type calcium-binding  
14 protein RHE\_RS09670. In *R. leguminosarum* bv. *viciae*, an exported protein of the  
15 same family, designated NodO, has been shown to bind calcium and may be important  
16 for the attachment of the bacteria to roots (52). Other OMV-localized proteins that  
17 determine cell surface characteristics included the glucosyl ketal-pyruvate-transferase  
18 RHE\_RS16450 (a PssM ortholog), the glycosyl transferase RHE\_RS16485,  
19 peptidoglycan-binding protein LysM and the organic solvent tolerance protein OstA.  
20 The latter protein has varied roles in membrane synthesis in different bacteria and is an  
21 essential protein in *E. coli* (53). The L,D-transpeptidases RHE\_RS00275,  
22 RHE\_RS04095 and RHE\_RS06695 likely catalyze alternative peptidoglycan cross-  
23 linking reactions. In *E. coli*, the alternative cell wall cross-links introduced by these  
24 enzymes are essential for resistance to some antibiotics (54). Antibiotic resistance in  
25 rhizobia is potentially important for their competition with antibiotic-producing soil  
26 organisms (55). Other cell wall modifying enzymes identified in the OMVs include the

2 peptidoglycan-binding protein RHE\_RS09350 and the D-alanyl-D-alanine  
3 carboxypeptidase RHE\_RS11305.

4 Many proteins involved in transport or excretion were identified in the OMVs.  
5 Three chromosomally-encoded outer membrane *Rhizobium* outer membrane protein A  
6 (RopA) orthologs were found in the OMV fraction. The function of these porins in  
7 rhizobia is largely undefined but it was determined that the RopA1, RopA2 and RopA3  
8 proteins found in *R. etli* OMVs are not involved in copper transport like the plasmid-  
9 encoded RopAe (56), which was not present in the exoproteome. In *Sinorhizobium*  
10 *meliloti* RopA1 is a major phage binding site and, presumably due to other, yet  
11 undefined physiological roles, is essential for cell viability (57, 58). Some bacteria  
12 produce OMVs containing phage binding proteins as decoy targets for the virus (59,  
13 60). In *R. leguminosarum* bv. *viciae*, RopA1 and RopA2 are secreted, along with  
14 polysaccharidases PlyA1 and PlyA2, by the TISS (49). Other secretion-related OMV  
15 proteins include the preprotein translocase subunit YajC RHE\_RS09360, the  
16 ExbD/ToIR biopolymer transport family protein RHE\_RS17705 and the VirB4 family  
17 type IV secretion/conjugal transfer ATPase RHE\_RS21955. Two proteins annotated as  
18 sugar ABC transporter substrate binding proteins (RHE\_RS07970 and RHE\_RS16550)  
19 have sequence similarities to proteins involved in polysaccharide export. In the 24 h  
20 OMVs we identified two IM-localized MexE family multidrug efflux RND (resistance  
21 nodulation cell division) transporter periplasmic adaptor subunits, MexE1 and MexE2.  
22 These are expected to form part of the HlyD (Type I) multi-drug efflux system. A  
23 related protein, RHE\_RS18860, encodes an efflux RND transporter periplasmic adaptor  
24 subunit. RND efflux pumps contribute to nodulation competitiveness and antimicrobial  
25 compound resistance in *S. meliloti* (61). Mex efflux pumps were present in OMVs from  
26 *Pseudomonas* species (33). BamA (RHE\_RS09805) is the OM component of the  $\beta$ -

2 barrel assembly machinery (BAM) responsible for the insertion of virtually all OM  
3 proteins in Gram-negative bacteria (62). BamD, the outer membrane protein assembly  
4 factor that forms part of the Bam complex, was also present in OMVs. Although the  
5 reconstituted *E. coli* Bam complex is able to insert proteins into artificial membrane  
6 vesicles (63), it is not known whether Bam complex components can do the same in  
7 natural OMVs. Porin RHE\_RS04090 also has a sequence indicative of an OM beta-  
8 barrel protein. Three porins (RHE\_RS18285, RHE\_RS06895, RHE\_RS12455) all  
9 predicted to be OM proteins of the porin family common in alphaproteobacteria were  
10 present in the OMVs. Nodulation protein NodT RHE\_RS17445 is a chromosomally-  
11 encoded OM lipoprotein that is not involved in Nod factor synthesis or transport. A  
12 functional *nodT* is essential for the viability of *R. etli* CE3, where NodT is proposed to  
13 play a role in chromosome segregation or maintaining OM stability rather than as an  
14 export pump (64). The dicarboxylate transporter RHE\_RS15195 (DctA) is expected to  
15 be a symbiotically essential gene in *R. etli*, since rhizobial mutants defective in  
16 dicarboxylate transport are unable to fix nitrogen (65). Three other ABC transporter  
17 substrate binding proteins similar to UgpB are probably involved in glycerol 3-  
18 phosphate transport (RHE\_RS08805, RHE\_RS24975, RHE\_RS10590). Polyamines are  
19 involved in growth and stress resistance in rhizobia (66), RHE\_RS10970 resembles a  
20 lysine/arginine/ornithine-binding periplasmic protein that could transport polyamine  
21 precursor amino acids into the cell, and RHE\_RS22990 is likely a  
22 spermidine/putrescine-binding periplasmic protein (PotD). Some bacteria package  
23 signal molecules for quorum sensing in OMVs (10, 11, 67). Transporter  
24 RHE\_RS09265 is a FadL ortholog: in rhizobia, these are important for the uptake of  
25 quorum sensing system long-chain *N*-acyl-homoserine lactones. These FadL orthologs  
26 are probably involved in transporting long-chain acyl-homoserine lactones across the

2 OM (68), but the presence of a FadL transporter in OMVs could provide for their  
3 uptake into vesicles, which could deliver them, perhaps in a concentrated dose, to  
4 recipient cells.

5 Proteins involved in energy production and conversion represent more than 11 %  
6 of the OMV-exclusive proteins, over 2-fold more than among the periplasm-only  
7 proteins. For oxidative phosphorylation, numerous components of NADH  
8 dehydrogenase, cytochrome c, NADH-quinone oxidoreductase and ATP synthase were  
9 found principally in the OMVs, although not all of the proteins required to completely  
10 assemble these complexes was present.

11 Among the cytoplasmic proteins present only in OMVs, we found Tme, the  
12 NADP<sup>+</sup>-specific malic enzyme that in *S. meliloti* appears to serve as a secondary  
13 pathway for pyruvate synthesis during growth on succinate (69). Porphobilinogen  
14 synthase is required for the synthesis of tetrapyrrole pigments such as porphyrin and  
15 vitamin B12. Ribonuclease PH is involved in tRNA processing. Ribosomal protein  
16 subunits accounted for 2.6 and 4.2 %, respectively, of the *R. etli* periplasm- and OM-  
17 exclusive proteins and have been found in OMVs from *E. coli* and *Neisseria*  
18 *meningitides* (70, 71).

19 OMV localized chaperones include the cytoplasmic heat-shock protein Hsp20  
20 and the periplasmic peptidyl-prolyl isomerases SurA and RHE\_RS11115, the protease  
21 modulators HflC and HflK, and the RNA chaperone Hfq. The latter protein has diverse  
22 functions in riboregulation in rhizobia (72).

23 Finally, because some of the OMV-localized proteins like peptidoglycan  
24 modifying enzymes could have antimicrobial activity, we assayed for the ability of  
25 purified *R. etli* OMV to inhibit the growth of *Bacillus subtilis* (Fig. S1, Supplemental  
26 material). In plate assays, we found that purified OMVs and, especially, ethyl acetate

2 extracts of OMVs, did inhibit the growth of *B. subtilis*. No inhibition was observed  
3 with *R. etli* MM culture or culture supernatant, or with ethyl acetate.

4 In summary, we show here that *R. etli* produces OMVs with significant temporal  
5 differences in their protein content during growth in culture. The proteins in the OMVs  
6 are largely distinct from those of the periplasmic space and includes many proteins of  
7 physiological interest, including some with known symbiotic roles. The excretion of  
8 these proteins in OMVs could give a survival or metabolic advantage to free-living or  
9 symbiotically-associated *R. etli* cells, and provides an exciting topic of research that we  
10 are currently exploring.

11

## 12 MATERIAL AND METHODS

13 Bacterial strains and growth conditions. *Rhizobium etli* strain CE3 was  
14 maintained in 15 % glycerol stocks prepared from PY rich medium cultures containing  
15 200 and 20 µg/ml of streptomycin and nalidixic acid, respectively. Minimal medium  
16 (MM) contained 10 mM each of succinate and ammonium chloride as carbon and  
17 nitrogen sources, respectively (14). *Bacillus subtilis* 168 was obtained from E. Martínez  
18 (Centro de Ciencias Genómicas-UNAM, Cuernavaca, Mexico) and maintained on PY  
19 rich medium (14).

20 **Isolation of periplasmic proteins.** A modification of the hypo-osmotic shock  
21 technique used with *R. leguminosarum* by Krehenbrink *et al* (19) was used to isolate *R.*  
22 *etli* periplasmic proteins. To do this, bacterial cells obtained by centrifugation (6000 x  
23 g) were washed twice with cold 1.0 M NaCl, resuspended in cold sucrose buffer (20%  
24 (w/v) sucrose, 1 mM EDTA and 10 µl of protease inhibitor cocktail (#13743200,  
25 Roche) per 10 ml and incubated for 5 minutes at room temperature. The samples were  
26 centrifuged at 6000 x g for 10 minutes at 4°C, the pellets were resuspended in cold



2 distilled water for 5 minutes at room temperature followed by centrifugation as above  
3 for 30 minutes. The supernatants were transferred to new tubes and precipitated with 2.5  
4 volumes of cold acetone followed by overnight incubation at -20°C. The samples were  
5 centrifuged at 8000 x g for 45 minutes, the pellets were washed with 80% acetone and  
6 resuspended in urea solubilization buffer (7 M urea, 2% (v/v) CHAPS, 1 mM DTT) and  
7 stored at -20°C until analysis.

8 **Isolation of OMV proteins.** Cultures of *R. etli* were grown for 6 and 24 h in 2 L of  
9 MM under the conditions described previously (14). To isolate OMVs, the cultures  
10 were centrifuged at 6000 x g for 10 minutes at 4°C. The supernatant was filtered  
11 through a 0.22 µm filter and concentrated to dryness by lyophilization. Lyophilized  
12 samples were resuspended in 1 mM Tris-HCl (pH 8.0) buffer and ultracentrifuged in  
13 transparent tubes (Beckman 14 X 89 mm), at 100,000 x g for 2 h at 4°C in a SW41  
14 swinging bucket rotor (Beckman). The pellet was resuspended in 500 µl of 1 mM Tris-  
15 HCl (pH 8.0 buffer), the proteins were extracted with phenol and kept at -20°C until use  
16 (15).

17 **Transmission electron microscopy.** Samples from different purification stages of the  
18 of OMV and periplasm isolations were resuspended in 20 mM Tris-HCl (pH 8). Five µl  
19 of purified OMV samples were applied to 400-mesh copper grids, 2% acid  
20 phosphotungstic was added followed by incubation for 1 min at room temperature.  
21 Grids were observed in a JEM1011 (JEOL, Japan) at 100 kilowatts of acceleration  
22 voltage.

23 **SDS-PAGE and protein digestion.** The protein concentration of OMVs and periplasm  
24 samples was determined by the Bradford method (73). Gel electrophoresis was carried  
25 out on 12.5% resolving gels loaded with 20 µg of total protein per lane. Gels were  
26 stained with Coomassie blue and 5 mm wide gel slices were excised, transferred to

2 microcentrifuge tubes and covered with 20  $\mu$ l of 20% EtOH. Gel slices were  
3 sequentially washed with 100mM Tris-HCl (pH 8) and 50 % aqueous acetonitrile,  
4 reduced with 50 mM DTT in 50 mM Tris-HCl (pH 8) for 30 min at 37°C. Samples  
5 were alkylated with 50 mM iodoacetamide in 50mM Tris-HCl (pH 8) for 30 min at  
6 37°C (in darkness), and incubated for 5 h at 37°C with trypsin (10 ng/ $\mu$ l, sequencing  
7 grade, Promega, Switzerland) in 20 mM Tris-HCl (pH 8.). The tryptic fragments were  
8 extracted with 20  $\mu$ l of 20% (v/v) formic acid. Two independent experiments to obtain  
9 OMV and periplasmic fractions were performed, with 85% of the exoproteins identified  
10 being found in both experiments. Only these proteins are included in the data reported  
11 here.

12 **Mass spectrometry.** Peptide sequencing was performed on a LTQ XL-Orbitrap mass  
13 spectrometer (Thermo Fisher Scientific, Bremen; Germany) equipped with a Rheos  
14 Allegro nano flow system with AFM flow splitting (Flux Instruments, Reinach;  
15 Switzerland) and a nano electrospray ion source operated at a voltage of 1.6kV. Peptide  
16 separation was performed on a magic C18 nano column (5  $\mu$ m, 100 Å, 0.075 x 70 mm)  
17 using a flow rate of 400 nl/min and a linear gradient (60 min) from 5 to 40 %  
18 acetonitrile in H<sub>2</sub>O containing 0.1% formic acid. Data acquisition was in data dependent  
19 mode on top five peaks with an exclusion for 15 sec. Survey full scan MS spectra were  
20 from 300 to 1800m/z, with resolution R=60000 at 400 m/z, and fragmentation was  
21 achieved by collision induced dissociation with helium gas in the LTQ.

22 **Protein identification and prediction of subcellular localization.** Mascot generic  
23 files (mgf) were created by means of a pearl script using Hardklor software, v1.25 (M.  
24 Hoopmann and M. MacCoss, University of Washington). MS/MS data (mgf files) were  
25 submitted to EasyProt (version 2.3) for a search against the SwissProt database  
26 (Rhizobium\_Homo\_Tryp\_ForRev (20100415) in two rounds. First round parameters

2 were: parent error tolerance 20 ppm, normal cleavage mode with 1 missed cleavage,  
3 allowed amino acid modifications (fixed Cys\_CAM, variable Oxidation\_M), minimal  
4 peptide z-score 5, max p-value 0.01 and AC score of 5. Second round parameters were:  
5 parent error tolerance 20ppm, half cleaved mode with 4 missed cleavages, allowed  
6 amino acid modifications (variable Cys\_CAM, variable Deamid, variable phos, variable  
7 Oxidation\_M, variable pyrr) minimal peptide z-score 5, max p-value 0.01. Protein  
8 identifications were only accepted with an AC score of 10, meaning when two different  
9 peptide sequences could be matched. The PSLpred program (25) was used to predict  
10 the subcellular localization of the proteins. We determined potential protein-protein  
11 interactions among the *R. etli* exoproteome using the ProLinks server  
12 (<http://prl.mbi.ucla.edu/prlbeta/>) (36).

13 **Cytotoxic Activity of OMVs.** OMVs purified from 24 h *R. etli* CE3 were extracted  
14 with ethyl acetate. *B. subtilis* 168 was cultured overnight in PY at 30°C, cells were  
15 washed twice with sterile distilled water and diluted with sterile water to an optical  
16 density of 0.05 at 540 nm. Two-hundred µl of the *B. subtilis* cells were plated on petri  
17 dishes of PY supplemented with 0.1 mM CaCl<sub>2</sub>. Whatman filter paper circles 0.5 cm in  
18 diameter were placed on the plate and impregnated with 5 µl test samples. The plates  
19 were incubated for 48 hours at 30°C before determining the presence of zones of growth  
20 inhibition surrounding the paper discs.

21

## 22 SUPPLEMENTAL MATERIAL

23 Supplemental material for this article may be found at  
24 <https://doi.org/.....AEM....>

25

## 26 ACKNOWLEDGMENTS

27 We thank Esperanza Martínez (CCG-UNAM) for supplying *B. subtilis* 168. Part of this  
28 work was supported by CONACyT grant 220790 and DGAPA-PAPIIT grant IN213216.

## 2 REFERENCES

3

- 4 1. Green ER, Mecsas J. 2016. Bacterial Secretion Systems : An Overview.  
5 Microbiol Spectr 4:1–19.
- 6 2. Tsirigotaki A, De Geyter J, Šoštaric´ N, Economou A, Karamanou S. 2016.  
7 Protein export through the bacterial Sec pathway. Nat Rev Microbiol 15:21–36.
- 8 3. Chatterjee SN, Chaudhuri K. 2012. Outer Membrane Vesicles of Bacteria.
- 9 4. Weiner JH, Li L. 2008. Proteome of the *Escherichia coli* envelope and  
10 technological challenges in membrane proteome analysis. Biochim Biophys Acta  
11 - Biomembr 1778:1698–1713.
- 12 5. Goemans C, Denoncin K, Collet J-FF. 2014. Folding mechanisms of periplasmic  
13 proteins. Biochim Biophys Acta - Mol Cell Res 1843:1517–1528.
- 14 6. Roier S, Zingl FG, Cakar F, Durakovic S, Kohl P, Eichmann TO, Klug L,  
15 gadermaier B, Weinzerl K, Prassl R, Lass A, Daum G, Reidl J, Feleman MF,  
16 Schild S. 2016. A novel mechanism for the biogenesis of outer membrane  
17 vesicles in Gram-negative bacteria. Nat Commun 7:10515.
- 18 7. Orench-Rivera N, Kuehn MJ. 2016. Environmentally controlled bacterial  
19 vesicle-mediated exprot. Cell Microbiol 18:1525-1536.
- 20 8. Beveridge TJ. 1999. Structure of Gram-negative cell walls and their derived  
21 membrane vesicles. J Bacteriol 181:4725–4733.
- 22 9. Bonnington KE, Kuehn MJ. 2014. Protein selection and export via outer  
23 membrane vesicles. Biochim Biophys Acta - Mol Cell Res 1843:1612–1619.
- 24 10. Mashburn-Warren LM, Whiteley M. 2006. Special delivery: Vesicle trafficking  
25 in prokaryotes. Mol Microbiol 61:839–846.
- 26 11. Toyofuku M, Morinaga K, Hashimoto Y, Uhl J, Shimamura H, Inaba H, Schmitt-  
27 Kopplin P, Eberl L, Nomura N. 2017. Membrane vesicle-mediated bacterial  
28 communication. ISME J 11:1504–1509.
- 29 12. Jan AT. 2017. Outer membrane vesicles (OMVs) of gram-negative bacteria: a  
30 perspective update. Front Microbiol 8:1053.
- 31 13. Deakin WJ, Broughton WJ. 2009. Symbiotic use of pathogenic strategies:  
32 rhizobial protein secretion systems. Nat Rev Microbiol 7:312–320.
- 33 14. Meneses N, Mendoza-Hernández G, Encarnación S. 2010. The extracellular  
34 proteome of *Rhizobium etli* CE3 in exponential and stationary growth phase.  
35 Proteome Sci 8:51.

- 2 15. Meneses N, Taboada H, Dunn MF, Vargas M del C, Buchs N, Heller M,  
3 Encarnación S. 2017. The naringenin-induced exoproteome of *Rhizobium etli*  
4 CE3. Arch Microbiol 199:737–755.
- 5 16. Lynch JB, Alegado RA. 2017. Spheres of hope, packets of doom: The good and  
6 bad of outer membrane vesicles in interspecies and ecological dynamics. J  
7 Bacteriol 199:1–10.
- 8 17. Katsir L, Bahar O, Rodrigues M, Oliveira D, Joffe L, César G V. 2017. Bacterial  
9 outer membrane vesicles at the plant–pathogen interface. PLOS Pathog  
10 13:e1006306.
- 11 18. Glenn AR, Dilworth MJ. 1979. An examination of *Rhizobium leguminosarum* for  
12 the production of extracellular and periplasmic proteins. J Gen Microbiol  
13 112:405–409.
- 14 19. Krehenbrink M, Edwards A, Downie JA. 2011. The superoxide dismutase SodA  
15 is targeted to the periplasm in a SecA-dependent manner by a novel mechanism.  
16 Mol Microbiol 82:164–179.
- 17 20. Quan S, Hiniker A, Collet J-F, Bardwell JCA. 2013. Isolation of bacteria  
18 envelope proteins. Methods Mol Biol 966:359–66.
- 19 21. Imperi F, Ciccocanti F, Perdomo AB, Tiburzi F, Mancone C, Alonzi T, Ascenzi  
20 P, Piacentini M, Visca P, Fimia GM. 2009. Analysis of the periplasmic proteome  
21 of *Pseudomonas aeruginosa*, a metabolically versatile opportunistic pathogen.  
22 Proteomics 9:1901–1915.
- 23 22. Wilmes B, Kock H, Glagla S, Albrecht D, Voigt B, Markert S, Gardebrecht A,  
24 Bode R, Danchin A, Feller G, Hecker M, Schweder T. 2011. Cytoplasmic and  
25 periplasmic proteomic signatures of exponentially growing cells of the  
26 psychrophilic bacterium *Pseudoalteromonas haloplanktis* TAC125. Appl  
27 Environ Microbiol 77:1276–1283.
- 28 23. Watt SA, Wilke A, Patschkowski T, Niehaus K. 2005. Comprehensive analysis  
29 of the extracellular proteins from *Xanthomonas campestris* pv. *campestris* B100.  
30 Proteomics 5:153–67.
- 31 24. Han MJ, Kim JY, Kim JA. 2014. Comparison of the large-scale periplasmic  
32 proteomes of the *Escherichia coli* K-12 and B strains. J Biosci Bioeng 117:437–  
33 442.
- 34 25. Bhasin M, Garg A, Raghava GPS. 2005. PSLpred: Prediction of subcellular  
35 localization of bacterial proteins. Bioinformatics 21:2522–2524.

- 2 26. Goldberg T, Hecht M, Hamp T, Karl T, Yachdav G, Ahmed N, Altermann U,  
3 Angerer P, Ansorge S, Balasz K, Bernhofer M, Betz A, Cizmadija L, Trinh Do  
4 K, Gerke J, Greil R, Joerdens V, Hastreiter M, Hembach K, Herzog M,  
5 Kalemanov M, Kluge M, Meier A, Nasir H, Neumaier U, Prade V, Reeb J,  
6 Sorokoumov A, Troshani I, Vorberg S, Waldruff S, Zierer J, Nielsen H, Rost B.  
7 2014. LocTree3 prediction of localization. *Nucleic Acids Res* 42:W350–W355.
- 8 27. Encarnación S, Guzmán Y, Dunn MF, Hernández M, Vargas MDC, Mora J. 2003.  
9 Proteome analysis of aerobic and fermentative metabolism in *Rhizobium etli*  
10 CE3. *Proteomics* 3:1077–1085.
- 11 28. Streeter JG. 1989. Analysis of periplasmic enzymes in intact cultured bacteria  
12 and bacteroids of *Bradyrhizobium japonicum* and *Rhizobium leguminosarum*  
13 biovar *phaseoli* J Gen Microbiol :3477–3484.
- 14 29. Lee E-YY, Bang JY, Park GW, Choi D-SS, Kang JS, Kim H-JJ, Park K-SS, Lee  
15 J-OOO, Kim Y-KK, Kwon K-HH, Kim K-PP, Gho YS, Joo YB, Gun WP, Choi  
16 D-SS, Ji SK, Kim H-JJ, Park K-SS, Lee J-OOO, Kim Y-KK, Kwon K-HH, Kim  
17 K-PP, Yong SG, Bang JY, Park GW, Choi D-SS, Kang JS, Kim H-JJ, Park K-SS,  
18 Lee J-OOO, Kim Y-KK, Kwon K-HH, Kim K-PP, Gho YS. 2007. Global  
19 proteomic profiling of native outer membrane vesicles derived from *Escherichia*  
20 *coli*. *Proteomics* 7:3143–3153.
- 21 30. Kulp A, Kuehn MJ. 2010. Biological Functions and Biogenesis of Secreted  
22 Bacterial Outer Membrane Vesicles. *Annu Rev Microbiol* 64:163–184.
- 23 31. Avila-Calderón ED, Lopez-Merino A, Jain N, Peralta H, Lopez-Villegas EO,  
24 Sriranganathan N, Boyle SM, Witonsky S, Contreras-Rodríguez A. 2012.  
25 Characterization of outer membrane vesicles from *Brucella melitensis* and  
26 protection induced in mice. *Clin Dev Immunol* 2012.
- 27 32. Bai J, Kim SI, Ryu S, Yoon H. 2014. Identification and characterization of outer  
28 membrane vesicle-associated proteins in *Salmonella enterica* serovar  
29 *Typhimurium*. *Infect Immun* 82:4001–4010.
- 30 33. Choi C-W, Park EC, Yun SH, Lee S-Y, Lee YG, Hong Y, Park KR, Kim S-H,  
31 Kim G-H, Kim S Il. 2014. Proteomic Characterization of the Outer Membrane  
32 Vesicle of *Pseudomonas putida* KT2440. *J Proteome Res* 13:4298–4309.
- 33 34. Schwechheimer C, Kuehn MJ. 2015. Outer-membrane vesicles from Gram-  
34 negative bacteria: biogenesis and functions. *Nat Rev Microbiol* 13:605–619.
- 35 35. Schwechheimer C, Sullivan CJ, Kuehn MJ. 2013. Envelope control of outer

- 2 membrane vesicle production in Gram-negative bacteria. *Biochemistry* 52:3031–  
3 3040.
- 4 36. Bowers PM, Pellegrini M, Thompson, MJ, Fierro J, Yeates TO David Eisenberg  
5 D. 2004. Prolinks: a database of protein functional linkages derived from  
6 coevolution. *Genome Biol* 20045:R35
- 7 37. Bittinger MA, Handelsman J. 2000. Identification of genes in the RosR regulon  
8 of *Rhizobium etli*. *J Bacteriol* 182:1706-1713.
- 9 38. Salazar E, Díaz-Mejía JJ, Moreno-Hagelsieb G, Martínez-Batallar G, Mora Y,  
10 Mora J, Encarnación S. 2010. Characterization of the NifA-RpoN regulon in  
11 *Rhizobium etli* in free life and in symbiosis with *Phaseolus vulgaris*. *Appl*  
12 *Environ Microbiol* 76:4510-4520.
- 13 39. Vercruyse M, Fauvart M, Jans A, Beullens S, Braeken K, Cloots L, Engelen K,  
14 Marchal K, Michiels J. 2011. Stress response regulators identified through  
15 genome-wide transcriptome analysis of the (p)ppGpp-dependent response in *R.*  
16 *etli*. *Genome Biol* 12:R17.
- 17 40. Reyes-Pérez A, del Carmen Vargas M, Hernández M, Aguirre-von-Wobeser E,  
18 Pérez-Ruedas E, Encarnación S. 2016. Transcriptomic analysis of the process of  
19 biofilm formation in *Rhizobium etli* CFN42. *Arch Microbiol* 198:847-860.
- 20 41. Lee E-Y, Choi D-S, Kim K-P, Gho YS. 2008. Proteomics in gram-negative  
21 bacterial outer membrane vesicles. *Mass Spectrom Rev* 27:535–555.
- 22 42. Delepelaire P. 2004. Type I secretion in gram-negative bacteria. *Biochim*  
23 *Biophys Acta - Mol Cell Res* 1694:149–161.
- 24 43. Downie JA. 2010. The roles of extracellular proteins, polysaccharides and signals  
25 in the interactions of rhizobia with legume roots. *FEMS Microbiol Rev* 34:150–  
26 70
- 27 44. Ausmees N, Jacobsson K, Lindberg M. 2001. A unipolarly located, cell-surface-  
28 associated agglutinin, RapA, belongs to a family of *Rhizobium*-adhering  
29 proteins (Rap) in *Rhizobium leguminosarum* bv. *trifolii*. *Microbiol* 147:549-559.
- 30 45. Mongiardini EJ, Ausmees N, Pérez-Giménez J, Julia Althabegoiti M, Ignacio  
31 Quelas J, López-García SL, Lodeiro AR. 2008. The rhizobial adhesion protein  
32 RapA1 is involved in adsorption of rhizobia to plant roots but not in nodulation.  
33 *FEMS Microbiol Ecol* 65:279–288
- 34 46. Mongiardini EJ, Pérez-Giménez J, Althabegoiti MJ, Covelli J, Quelas J I, López-  
35 García SL, Lodeiro AR. 2009. Overproduction of the rhizobial adhesin RapA1

- 2 increases competitiveness for nodulation. *Soil Biol Biochem* 41:2017-2020.
- 3 47. Berne C, Ducret A, Hardy GG, Brun Y V. 2015. Adhesins Involved in  
4 Attachment to Abiotic Surfaces by Gram-Negative Bacteria. *Microbiol Spectr*  
5 3:1–45.
- 6 48. Finnie C, Zorreguieta A, Hartley NM, Downie JA. 1998. Characterization of  
7 *Rhizobium leguminosarum* exopolysaccharide glycanases that are secreted via a  
8 type I exporter and have a novel heptapeptide repeat motif. *J Bacteriol* 180:1691–  
9 1699.
- 10 49. Russo DM, Williams A, Edwards A, Posadas DM, Finnie C, Dankert M, Downie  
11 JA, Zorreguieta A. 2006. Proteins exported via the PrsD-PrsE type I secretion  
12 system and the acidic exopolysaccharide are involved in biofilm formation by  
13 *Rhizobium leguminosarum*. *J Bacteriol* 188:4474–4486.
- 14 50. Zorreguieta A, Finnie C, Downie JA. 2000. Extracellular glycanases of  
15 *Rhizobium leguminosarum* are activated on the cell surface by an  
16 exopolysaccharide-related component. *J Bacteriol* 182:1304–12.
- 17 51. Balsalobre C, Silván JM, Berglund S, Mizunoe Y, Uhlin BE, Wai SN. 2006.  
18 Release of the type I secreted alfa-haemolysin via outer membrane vesicles from  
19 *Escherichia coli*. *Mol Microbiol* 59:99–112.
- 20 52. Economou A, Hamilton WDO, Johnston AWB, Downie JA. 1990. The  
21 *Rhizobium* nodulation gene *nodO* encodes a Ca<sup>2+</sup>-binding protein that is exported  
22 without N-terminal cleavage and is homologous to haemolysin and related  
23 proteins. *EMBO J* 9:349-354.
- 24 53. Braun M, Silhavy TJ. 2002. Imp/OstA is required for cell envelope biogenesis in  
25 *Escherichia coli*. *Mol Microbiol* 45:1289–1302.
- 26 54. Magnet S, Dubost L, Marie A, Arthur M, Gutmann L. 2008. Identification of the  
27 L,D-transpeptidases for peptidoglycan cross-linking in *Escherichia coli*. *J*  
28 *Bacteriol* 190:4782–4785.
- 29 55. Naamala J, Jaiswal SK, Dakora FD. 2016. Antibiotics resistance in *Rhizobium*:  
30 Type, process, mechanism and benefit for agriculture. *Curr Microbiol* 72:804-  
31 816.
- 32 56. González-Sánchez A, Cubillas CA, Miranda F, Dávalos A, García-de los Santos  
33 A. 2017. The ropAe gene encodes a porin-like protein involved in copper transit  
34 in *Rhizobium etli* CFN42. *MicrobiologyOpen* 2017:e573.
- 35 57. Roest HP, Bloemendaal CJP, Wijffelman CA, Lugtenberg BJJ. 1995. Isolation



- 2 and characterization of ropA homologous genes from *Rhizobium leguminosarum*  
3 biovars *viciae* and *trifolii*. J Bacteriol 177:4985–4991.
- 4 58. Crook MB, Draper AL, Guillory RJ, Griffitts JS. 2013. The *Sinorhizobium*  
5 *meliloti* essential porin ropal1 is a target for numerous bacteriophages. J Bacteriol  
6 195:3663–3671.
- 7 59. Pérez-Montaña F, del Cerro P, Jiménez-Guerrero I, López-Baena FFJ, Cubo MT,  
8 Hungria M, Megías M, Ollero FFJ, Broughton W, Jabbouri S, Perret X, Oldroyd  
9 G, Black M, Moolhuijzen P, Chapman B, Barrero R, Howieson J, Hungria M,  
10 Hameren B, Hayashi S, Gresshoff P, Ferguson B, Hungria M, Phillips D, Phillips  
11 D, Joseph C, Maxwell C, Cooper J, Martínez-Romero E, Segovia L, Mercante F,  
12 Franco A, Graham P, Pardo M, Gomes D, Ormeño-Orrillo E, Hungria M, Poupot  
13 R, Martínez-Romero E, Promé J, Garcia M, Dunlap J, Loh J, Stacey G, Estévez J,  
14 Soria-Díaz M, Córdoba F, Morón B, Manyani H, Gil A, Morón B, Soria-Díaz M,  
15 Ault J, Verroios G, Noreen S, Rodríguez-Navarro D, Guasch-Vidal B, Estévez J,  
16 Dardanelli M, Soria-Díaz M, Córdoba F, Balog C, Zahran H, López-Leal G,  
17 Tabche M, Castillo-Ramírez S, Mendoza-Vargas A, Ramírez-Romero M, Dávila  
18 G, Ormeño-Orrillo E, Menna P, Gonzaga L, Ollero FFJ, Nicolas M, Rodrigues E,  
19 John M, Röhring H, Schmidt J, Wienecke U, Schell J, Rhijn P, Feys B, Verreth  
20 C, Vanderleyden J, Cerro P, Rolla-Santos A, Gomes D, Marks B, Pérez-Montaña  
21 F, Rodríguez-Carvajal MP, Cerro P, Rolla-Santos A, Gomes D, Marks B, Espuny  
22 M, Rodríguez-Carvajal MP, Hansen K, Irizarry R, Wu Z, Alexandre A, Laranjo  
23 M, Oliveira S, Gomes D, Batista J, Schiavon A, Andrade D, Hungria M, Theunis  
24 M, Kobayashi H, Broughton W, Prinsen E, Kobayashi H, Naciri-Graven Y,  
25 Broughton W, Perret X, Ampomah O, Avetisyan A, Hansen E, Svenson J, Huser  
26 T, Jensen J, Strøm A, Kaasen I, Park S, Chao X, Gonzalez-Bonet G, Beel B,  
27 Bilwes A, Crane B, Zatakia H, Nelson C, Syed U, Scharf B, Kroll J, Loynds B,  
28 Brophy L, Moxon E, Boboye B, Jones J, Dangel J, Vinardell J, Ollero FFJ,  
29 Hidalgo A, López-Baena FFJ, Medina C, Ivanov-Vangelov K, Fujishige N, Lum  
30 M, Hoff P, Whitelegge J, Faull K, Hirsch A, Pérez-Montaña F, Jiménez-Guerrero  
31 I, Cerro P, Baena-Ropero I, López-Baena FFJ, Ollero FFJ, Beringer J, Pfaffl M,  
32 Trapnell C, Williams B, Perteau G, Mortazavi A, Kwan G, Baren M, Anders S,  
33 Huber W, Robinson M, McCarthy D, Smyth G, Huang D, Sherman B, Sousa C,  
34 Folch J, Boloix P, Megías M, Nava N, Quinto C, Okker R, Spaink H, Lugtenberg  
35 B, Schlaman H, Cubo MT, Hungria M, Megías M, Ollero FFJ. 2016. RNA-seq

- 2 analysis of the *Rhizobium tropici* CIAT 899 transcriptome shows similarities in  
3 the activation patterns of symbiotic genes in the presence of apigenin and salt.  
4 BMC Genomics 17:1–11.
- 5 60. Guerrero-Mandujano A, Hernández-Cortez C, Ibarra JA, Castro-Escarpulli G.  
6 2017. The outer membrane vesicles: Secretion system type zero. Traffic 18:425–  
7 432.
- 8 61. Eda S, Mitsui H, Minamisawa K. 2011. Involvement of the SmeAB multidrug  
9 efflux pump in resistance to plant antimicrobials and contribution to nodulation  
10 competitiveness in *Sinorhizobium meliloti*. Appl Environ Microbiol 77:2855-  
11 2882.
- 12 62. Knowles TJ, Scott-Tucker A, Overduin M, Henderson IR. 2009. Membrane  
13 protein architects: the role of the BAM complex in outer membrane protein  
14 assembly. Nat Rev Microbiol 7:206–214.
- 15 63. Hussain S, Bernstein HD. 2018. The Bam complex catalyzes efficient insertion  
16 of bacterial outer membrane proteins into membrane vesicles of variable lipid  
17 composition. J Biol Chem 293:2959-2973.
- 18 64. Hernández-Mendoza A, Nava N, Santana O, Abreu-Goodger C, Tovar A, Quinto  
19 C. 2007. Diminished redundancy of outer membrane factor proteins in  
20 Rhizobiales: A nodT homolog is essential for free-living *Rhizobium etli*. J Mol  
21 Microbiol Biotechnol 13:22–34.
- 22 65. Yurgel SN, Kahn ML. 2004. Dicarboxylate transport by rhizobia. FEMS  
23 Microbiol Rev 28:489–501.
- 24 66. Dunn MF. 2017. Rhizobial Amino Acid Metabolism: Polyamine Biosynthesis  
25 and Functions. En: Handbook of Microbial Metabolism of Amino Acids  
26 (D'Mello FJ, ed). CAB International. pp. 352-370.
- 27 67. Mashburn LM, Whiteley M. 2005. Membrane vesicles traffic signals and  
28 facilitate group activities in a prokaryote. Nature 437:422–425.
- 29 68. Krol E, Becker A. 2014. Rhizobial homologs of the fatty acid transporter FadL  
30 facilitate perception of long-chain acyl-homoserine lactone signals. Proc Natl  
31 Acad Sci 111:10702–10707.
- 32 69. Zhang Y, Smallbone LA, diCenzo GC, Morton R, Finan TM. 2016. Loss of malic  
33 enzymes leads to metabolic imbalance and altered levels of trehalose and  
34 putrescine in the bacterium *Sinorhizobium meliloti*. BMC Microbiol 16:163.
- 35 70. Aguilera L, Toloza L, Giménez R, Odena A, Oliveira E, Aguilar J, Badia J,

- 2           Baldomà L. 2014. Proteomic analysis of outer membrane vesicles from the  
3           probiotic strain *Escherichia coli* Nissle 1917. *Proteomics* 14:222–229.
- 4    71.    Vipond C, Wheeler JX, Jones C, Feavers IM, Suker J. 2005. Characterization of  
5           the protein content of a meningococcal outer membrane vesicle vaccine by  
6           polyacrylamide gel electrophoresis and mass spectrometry. *Hum Vaccin* 1:80–4.
- 7    72.    Becker A, Overlöper A, Schlüter J-P, Reinkensmeier J, Robledo M, Giegerich R,  
8           Narberhaus F, Evguenieva-Hackenberg E. 2014. Riboregulation in plant-  
9           associated  $\alpha$ -proteobacteria. *RNA Biol* 11:550–562.
- 10   73.    Bradford MM. 1976. A rapid and sensitive method for the quantitation of  
11           microgram quantities of protein utilizing the principle of protein-dye binding.  
12           *Anal Biochem* 72:248–254.

- 2 **Table 1** Proteins occurring in *R. etli* OMVs but absent from the periplasm. The  
 3 presence of the protein at 6 and/or 24 h is indicated by a shaded box.

| <b>Protein(s) and accession number<sup>a</sup></b>                                                 | <b>Loc.<sup>b</sup></b> | <b>COG<sup>c</sup></b> | <b>6 h</b> | <b>24 h</b> |
|----------------------------------------------------------------------------------------------------|-------------------------|------------------------|------------|-------------|
| Autoaggregation protein RHE_RS11065                                                                | Per                     | -                      |            |             |
| Autoaggregation protein RHE_RS12180                                                                | Cyt                     | -                      |            |             |
| Autoaggregation protein RHE_RS23910                                                                | Per                     | -                      |            |             |
| Hypothetical protein RHE_RS20105                                                                   | Per                     | -                      |            |             |
| Hypothetical protein RHE_RS26095                                                                   | IM                      | -                      |            |             |
| Hypothetical proteins RHE_RS04195, RHE_RS04515                                                     | Per                     | -                      |            |             |
| Hypothetical proteins RHE_RS05200, RHE_RS11420, RHE_RS16465, RHE_RS21050                           | Cyt                     | -                      |            |             |
| Hypothetical proteins RHE_RS05795, RHE_RS07780, RHE_RS08450, RHE_RS13310, RHE_RS13575              | Cyt                     | -                      |            |             |
| Hypothetical proteins RHE_RS06290, RHE_RS17695, RHE_RS18165, RHE_RS24115, RHE_RS24445, RHE_RS24870 | Per                     | -                      |            |             |
| Hypothetical proteins RHE_RS08890, RHE_RS11225                                                     | Per                     | -                      |            |             |
| Polysaccharidase RHE_RS03110                                                                       | Per                     | -                      |            |             |
| Polysaccharidase RHE_RS13340                                                                       | Per                     | -                      |            |             |
| Porin RHE_RS18285                                                                                  | OM                      | -                      |            |             |
| Porins RHE_RS06895, RHE_RS12455                                                                    | OM                      | -                      |            |             |
| Pseudo RHE_RS31185, RHE_RS31705                                                                    | Ext                     | -                      |            |             |
| Right-handed parallel beta-helix repeat-containing protein RHE_RS13345                             | Per                     | -                      |            |             |
| RTX toxin RHE_RS09670                                                                              | Ext                     | -                      |            |             |
| SPOR domain-containing protein RHE_RS09300                                                         | IM                      | -                      |            |             |
| ATP synthase subunit alpha RHE_RS19810                                                             | IM                      | C                      |            |             |
| ATP synthase subunit B 1 RHE_RS04365                                                               | Cyt                     | C                      |            |             |
| C4-dicarboxylate transporter RHE_RS15195                                                           | IM                      | C                      |            |             |
| Cytochrome b RHE_RS15535                                                                           | IM                      | C                      |            |             |

|                                                                      |     |   |  |  |
|----------------------------------------------------------------------|-----|---|--|--|
| Cytochrome c family protein RHE_RS13405                              | Per | C |  |  |
| Cytochrome c oxidase subunit II CoxB RHE_RS04795                     | IM  | C |  |  |
| Cytochrome c1 family protein RHE_RS15530                             | Per | C |  |  |
| Dihydrolipoyl dehydrogenase RHE_RS19855                              | Cyt | C |  |  |
| F <sub>0</sub> F <sub>1</sub> ATP synthase subunit gamma RHE_RS19805 | IM  | C |  |  |
| NADH dehydrogenase subunit E RHE_RS08225                             | Cyt | C |  |  |
| NADH-quinone oxidoreductase subunit B 1 RHE_RS08200                  | Cyt | C |  |  |
| NADH-quinone oxidoreductase subunit C RHE_RS08205                    | Cyt | C |  |  |
| NADH-quinone oxidoreductase subunit D 1 RHE_RS08215                  | Cyt | C |  |  |
| NADH-quinone oxidoreductase subunit G RHE_RS08240                    | Per | C |  |  |
| NADH-quinone oxidoreductase subunit I 1 RHE_RS08250                  | Cyt | C |  |  |
| NADH-ubiquinone oxidoreductase RHE_RS09650                           | Per | C |  |  |
| NADH:ubiquinone oxidoreductase subunit NDUFA12 RHE_RS09530           | Per | C |  |  |
| NADP-dependent malic enzyme RHE_RS01970                              | IM  | C |  |  |
| Pyruvate dehydrogenase complex E1 component subunit beta RHE_RS09875 | Cyt | C |  |  |
| Septum formation inhibitor Maf RHE_RS02960                           | IM  | D |  |  |
| ABC transporter substrate-binding protein RHE_RS15485                | IM  | E |  |  |
| ABC transporter substrate-binding proteins RHE_RS10970, RHE_RS22990  | Per | E |  |  |
| Alanine dehydrogenase Ald RHE_RS09050                                | Cyt | E |  |  |
| Amino acid ABC transporter substrate-binding protein RHE_RS07475     | Per | E |  |  |
| Argininosuccinate synthase RHE_RS20070                               | Cyt | E |  |  |
| Asparagine synthetase B AsnB RHE_RS03835                             | IM  | E |  |  |
| Cysteine synthase A CysK RHE_RS01645                                 | Cyt | E |  |  |
| Glycine dehydrogenase GcvP RHE_RS11470                               | Cyt | E |  |  |

|                                                                                                             |     |   |  |  |
|-------------------------------------------------------------------------------------------------------------|-----|---|--|--|
| NAD-glutamate dehydrogenase RHE_RS20990                                                                     | Per | E |  |  |
| Periplasmic alpha-galactoside-binding protein RHE_RS24485                                                   | Per | E |  |  |
| Adenylosuccinate lyase RHE_CH02273                                                                          | Cyt | F |  |  |
| Dihydroorotase RHE_RS08400                                                                                  | Cyt | F |  |  |
| Multifunctional 2',3'-cyclic-nucleotide 2'-phosphodiesterase/5'-nucleotidase/3'-nucleotidase-5' RHE_RS18170 | Per | F |  |  |
| Phosphoribosylaminoimidazolesuccinocarboxamide synthase RHE_RS11645                                         | Cyt | F |  |  |
| Ribose-phosphate pyrophosphokinase RHE_RS15465                                                              | IM  | F |  |  |
| ABC transporter permease RHE_RS16190                                                                        | IM  | G |  |  |
| ABC transporter substrate-binding protein RHE_RS02490                                                       | Per | G |  |  |
| Arabinose ABC transporter substrate-binding protein RHE_RS18895                                             | Per | G |  |  |
| Carbohydrate ABC transporter substrate-binding protein RHE_RS08805                                          | Per | G |  |  |
| Carbohydrate ABC transporter substrate-binding protein RHE_RS10590                                          | Per | G |  |  |
| Sugar ABC transporter ATP-binding protein RHE_RS24975                                                       | Per | G |  |  |
| Sugar ABC transporter substrate-binding protein RHE_RS22625                                                 | Per | G |  |  |
| Sugar ABC transporter substrate-binding protein RHE_RS26655                                                 | IM  | G |  |  |
| Porphobilinogen synthase RHE_RS07675                                                                        | Cyt | H |  |  |
| Riboflavin synthase RHE_RS07710                                                                             | Cyt | H |  |  |
| Acetyl-CoA carboxylase carboxyl transferase subunit alpha RHE_RS19575                                       | Cyt | I |  |  |
| Beta-ketoacyl-ACP reductase RHE_RS20550                                                                     | Cyt | I |  |  |
| Enoyl-[acyl-carrier-protein] reductase RHE_RS04730                                                          | Cyt | I |  |  |
| Transporter RHE_RS09265                                                                                     | OM  | I |  |  |
| 30S ribosomal protein S12 RHE_RS08550                                                                       | Per | J |  |  |

|                                                                                                            |     |   |  |  |
|------------------------------------------------------------------------------------------------------------|-----|---|--|--|
| 50S ribosomal protein L1 RHE_RS08520                                                                       | Per | J |  |  |
| 50S ribosomal protein L15 RHE_RS08670                                                                      | Cyt | J |  |  |
| 50S ribosomal proteins L22 RHE_RS08600 L24 RHE_RS08630, L30 RHE_RS08665                                    | Cyt | J |  |  |
| 50S ribosomal protein L31 RHE_RS17920                                                                      | Per | J |  |  |
| Ribonuclease PH RHE_RS01835                                                                                | Cyt | J |  |  |
| Translation initiation factor IF-1 InfA RHE_RS02950                                                        | IM  | J |  |  |
| Transcription elongation factor GreA RHE_RS15185                                                           | Cyt | K |  |  |
| DNA gyrase subunit A RHE_RS10805                                                                           | IM  | L |  |  |
| Integration host factor subunit alpha RHE_RS07825                                                          | Cyt | L |  |  |
| Chromosome partitioning protein ParA RHE_RS16540                                                           | IM  | M |  |  |
| Complex I NDUF9 subunit family protein RHE_RS01580                                                         | Cyt | M |  |  |
| Curlin RHE_RS24865                                                                                         | Per | M |  |  |
| D-alanyl-D-alanine carboxypeptidase RHE_RS11305                                                            | Per | M |  |  |
| Efflux RND transporter periplasmic adaptor subunit RHE_RS18860                                             | Cyt | M |  |  |
| Exopolysaccharide glucosyl ketal-pyruvate-transferase RHE_RS16450                                          | Cyt | M |  |  |
| GDP-fucose synthetase RHE_RS03860                                                                          | IM  | M |  |  |
| Glycosyl transferase RHE_RS16485                                                                           | Cyt | M |  |  |
| MexE family multidrug efflux RND transporter periplasmic adaptor subunits RHE_RS17125, RHE_RS17180 (MexE2) | IM  | M |  |  |
| Nodulation protein NodT RHE_RS17445                                                                        | OM  | M |  |  |
| Organic solvent tolerance protein OstA RHE_RS07410                                                         | Per | M |  |  |
| Outer membrane protein assembly factor BamA RHE_RS09805                                                    | OM  | M |  |  |
| Peptidoglycan-binding protein RHE_RS09350                                                                  | OM  | M |  |  |
| Porin RHE_RS0409                                                                                           | OM  | M |  |  |
| Sugar ABC transporter substrate-binding protein RHE_RS07970                                                | Per | M |  |  |

|                                                                        |     |   |  |  |
|------------------------------------------------------------------------|-----|---|--|--|
| Sugar ABC transporter substrate-binding protein RHE_RS16550            | OM  | M |  |  |
| Flagellar basal body rod modification protein FlgD RHE_RS03460         | Per | N |  |  |
| Flagellar basal body rod proteins FlgF RHE_RS03315, FlgG RHE_RS03345   | Per | N |  |  |
| Flagellar hook protein FlgE RHE_RS03435                                | Per | N |  |  |
| Flagellar hook-associated protein FlgK RHE_RS03440                     | Per | N |  |  |
| Flagellar hook-associated protein FlgL RHE_RS03445                     | Per | N |  |  |
| Flagellin C protein RHE_RS14380                                        | Ext | N |  |  |
| Flagellin RHE_RS03400                                                  | Ext | N |  |  |
| GlcNAc transferase RHE_RS18450                                         | OM  | N |  |  |
| Heat-shock protein Hsp20 RHE_RS01855                                   | Cyt | O |  |  |
| Metallopeptidase RHE_RS03660                                           | Ext | O |  |  |
| Metalloprotease RHE_RS08470                                            | Cyt | O |  |  |
| Molecular chaperone SurA RHE_RS07405                                   | Per | O |  |  |
| Peptidylprolyl isomerase RHE_RS11115                                   | Per | O |  |  |
| Protease modulators RHE_RS14300 (HflC), RHE_RS14305 (HflK)             | Per | O |  |  |
| Carbonic anhydrase RHE_RS30365                                         | Cyt | P |  |  |
| Copper oxidase RHE_RS12890                                             | Per | P |  |  |
| Fe <sup>3+</sup> ABC transporter substrate-binding protein RHE_RS13955 | Per | P |  |  |
| Ferrichrome ABC transporter substrate-binding protein RHE_RS13730      | Per | P |  |  |
| Hemin ABC transporter substrate-binding protein RHE_RS16725            | Per | P |  |  |
| ABC transporter RHE_RS11985                                            | Per | R |  |  |
| Acyltransferase RHE_RS30975                                            | Cyt | R |  |  |
| Membrane protein RHE_RS24075                                           | Cyt | R |  |  |
| Outer membrane protein assembly factor BamD RHE_RS14515                | Cyt | R |  |  |



|                                                                                       |     |   |  |  |
|---------------------------------------------------------------------------------------|-----|---|--|--|
| RNA-binding protein Hfq RHE_RS09975                                                   | Cyt | R |  |  |
| Zinc/cadmium-binding protein RHE_RS27255                                              | Per | R |  |  |
| DUF992 domain-containing protein RHE_RS22070                                          | Per | S |  |  |
| Hypothetical protein RHE_RS00750                                                      | Per | S |  |  |
| Hypothetical protein RHE_RS06795                                                      | Cyt | S |  |  |
| Hypothetical protein RHE_RS09255                                                      | IM  | S |  |  |
| Hypothetical protein RHE_RS12895                                                      | Per | S |  |  |
| L,D-transpeptidase RHE_RS00275                                                        | Per | S |  |  |
| L,D-transpeptidase RHE_RS04095                                                        | OM  | S |  |  |
| L,D-transpeptidase RHE_RS06695                                                        | Cyt | S |  |  |
| Membrane protein RHE_RS19980                                                          | Ext | S |  |  |
| Peptidoglycan-binding protein LysM RHE_RS07230                                        | Cyt | S |  |  |
| Polyhydroxyalkanoate synthesis repressor PhaR RHE_RS20540                             | Cyt | S |  |  |
| Restriction endonuclease RHE_RS01175                                                  | IM  | S |  |  |
| Ribosome maturation factor RimP RHE_RS00610                                           | Cyt | S |  |  |
| Secretion protein RHE_RS02740                                                         | Cyt | S |  |  |
| Inosine-5-monophosphate dehydrogenase RHE_RS11270                                     | Cyt | T |  |  |
| Conjugal transfer protein TrbB RHE_RS21970                                            | Cyt | U |  |  |
| Conjugal transfer proteins RHE_RS21935 (TrbF), RHE_RS21930 (TrbG), RHE_RS21920 (TrbI) | Per | U |  |  |
| Hypothetical protein RHE_RS01020                                                      | OM  | U |  |  |
| Hypothetical protein RHE_RS25690                                                      | Per | U |  |  |
| Preprotein translocase subunit YajC RHE_RS09360                                       | OM  | U |  |  |
| Protein TolR RHE_RS17705                                                              | IM  | U |  |  |
| VirB4 family type IV secretion/conjugal transfer ATPase RHE_RS21955                   | Per | U |  |  |

- 2 <sup>a</sup>Protein names and accessions from GenBank. Where multiple proteins have the same COG, predicted  
3 localization and temporal distribution in periplasm and/or OMV, they are listed as a group.  
4 <sup>b</sup>Predicted cellular localization based on in silico analysis. Cyt, cytoplasmic; Ext, extracellular; IM, inner  
5 membrane; Per, periplasmic, OM, outer membrane.

2 <sup>c</sup>COGs (Clusters of Orthologous Groups) represent the following functional groups: minus sign, without  
3 COG; C, Energy production and conversion; D, Cell cycle control and mitosis; E, Amino Acid  
4 metabolism and transport; F, Nucleotide metabolism and transport; G, Carbohydrate metabolism and  
5 transport; H, Coenzyme metabolism; I, Lipid metabolism; J, Translation; K, Transcription; L, Replication  
6 and repair; M, Cell wall/membrane/envelope biogenesis; N, Cell motility; O, Post-translational  
7 modification, protein turnover, chaperone functions; P, Inorganic ion transport and metabolism; R,  
8 General Functional Prediction only; S, Function Unknown; T, Signal Transduction; U, Intracellular  
9 trafficking and secretion.

10

11

12

13

14

2 **Figure legends**

3

4 Fig. 1. OMVs from *Rhizobium etli* CE3. Panel A. Electron micrograph of a culture of  
5 strain CE3 showing OMVs (arrows). Panel B. Electron micrograph of purified OMVs.

6

7 Fig. 2. Distribution of periplasm-only (A) and OMV-only proteins (B) by functional  
8 category and presence at 6 h, 24 h, or both 6 and 24 h. GOG categories are as described  
9 in Table 1.

10

11 **Supplemental Material, Figure legend**

12 Fig. S1. Growth inhibition of *Bacillus subtilis* 168 by OMVs preparations from  
13 *Rhizobium etli* CE3. The filter paper discs on the lawn of *B. subtilis* cells were treated  
14 with 1) Strain CE3 culture; 2) Unfiltered culture supernatant; 3) Filtered (0.22  $\mu$ M)  
15 culture supernatant; 4) Ethyl acetate extract of OMVs; 5) Purified OMVs; 6) Ethyl  
16 acetate.

17

18

19

20

21

22

23

24

25

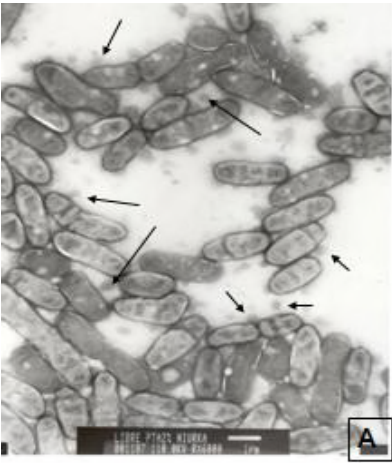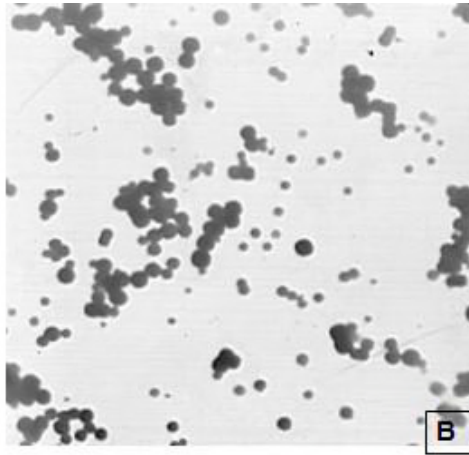

Fig. 1

**A.**

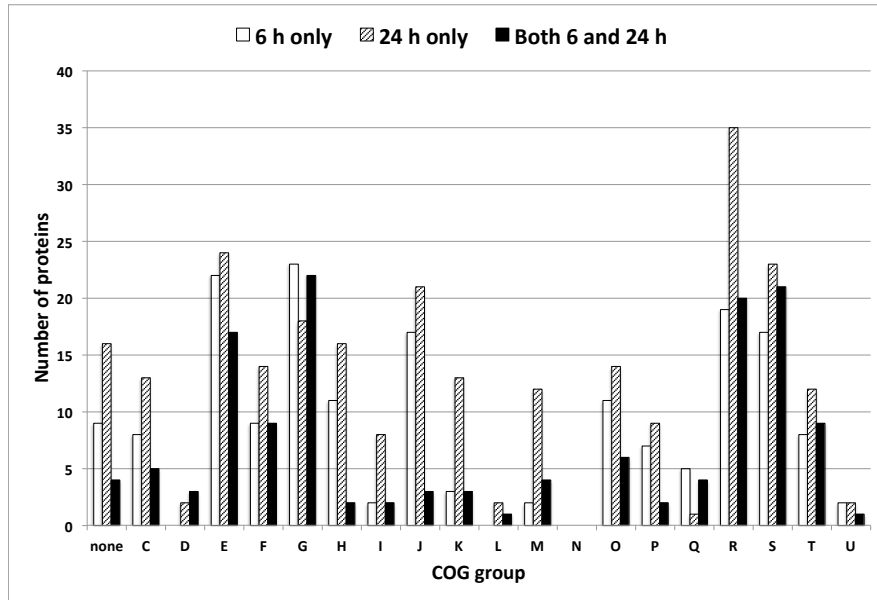

**B.**

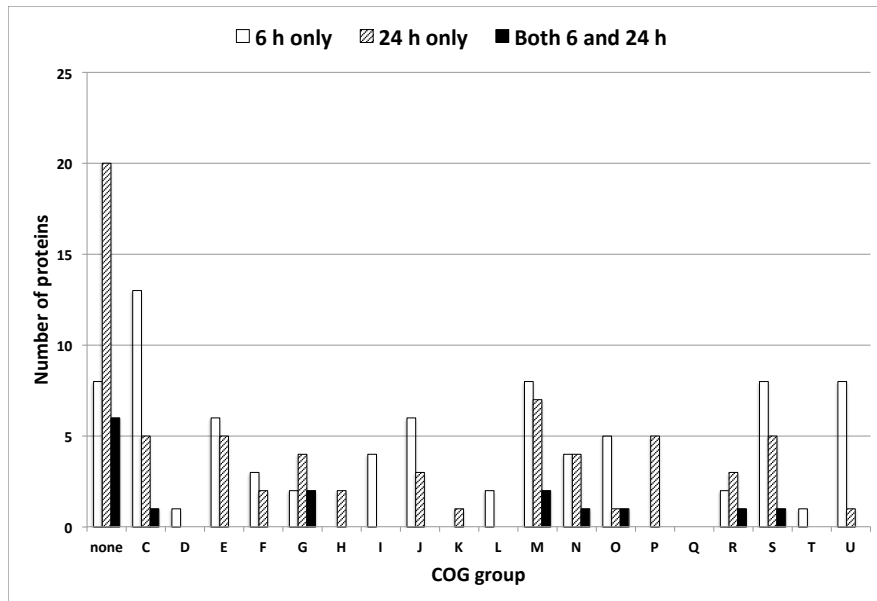

Source: https://www.biorxiv.org/content/10.1101/305797v1.full.pdf
